# Supplementary material for: Comparative Transcriptome Profiling of Two Tibetan Wild Barley Genotypes in Responses to Low Potassium
Source: PubMed Central journal article supplement (PMC4065039; doi:10.1371/journal.pone.0100567), 2014-06-20
Supplement: pone.0100567.s001.pdf [file pone.0100567.s001.pdf]

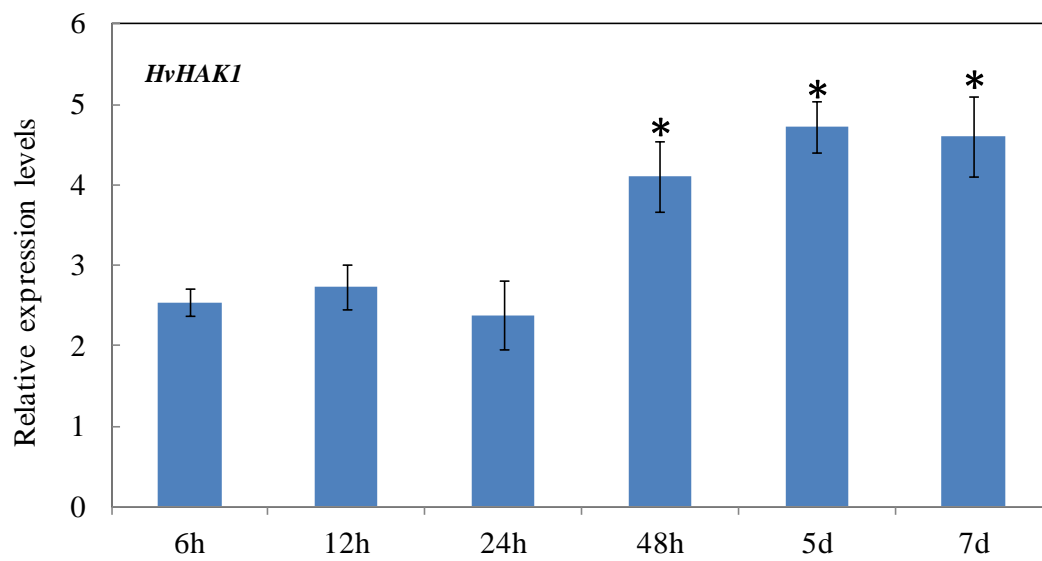

**Figure S1 Real-time PCR analysis of the *HvHAK1* gene under low K treatment.** \* Means significantly different according to the Duncan's multiple range,  $P < 0.05$ ,  $n = 6$ . Primers of *HvHAK1* and GAPDH for RT-PCR are listed in Table S6.
