# Supplementary material for: Comparative Transcriptome Profiling of Two Tibetan Wild Barley Genotypes in Responses to Low Potassium
Source: PubMed Central journal article supplement (PMC4065039; doi:10.1371/journal.pone.0100567), 2014-06-20
Supplement: pone.0100567.s002.pdf [file pone.0100567.s002.pdf]

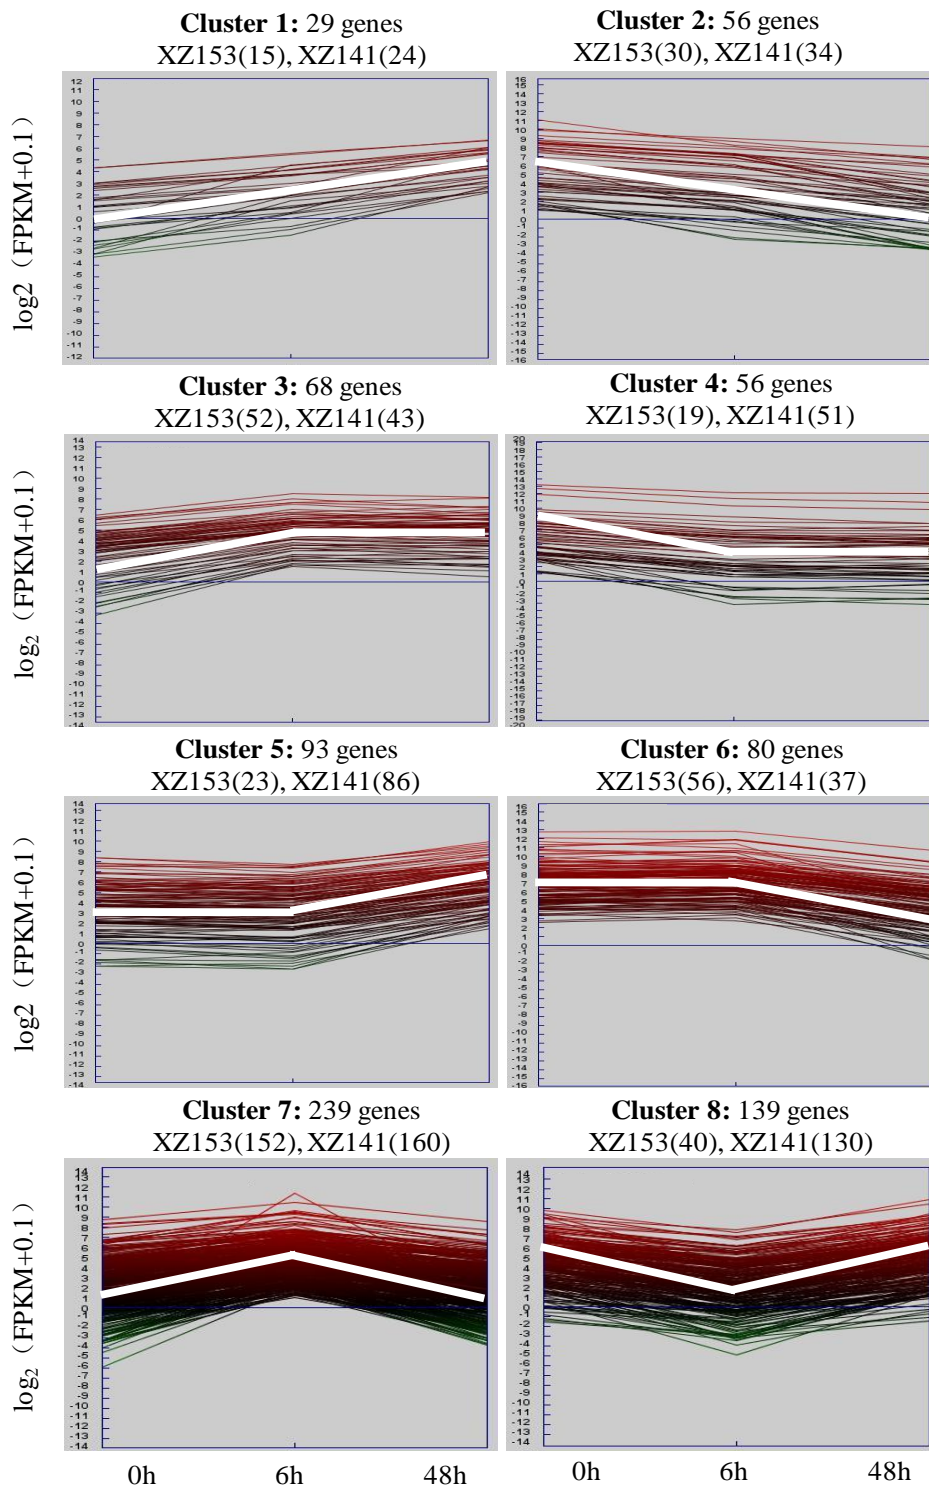

Figure S2. Cluster analysis of the DEGs in the two genotypes. 692 DEGs at 6 h and 48 h after low K treatment were clustered on the basis of the k-means method. Y-axis represents the gene expression values (FPKM) transformed by logarithms, base 2. The middle white line indicates the gene expression trend of each cluster.
