# Supplementary material for: Comparative Transcriptome Profiling of Two Tibetan Wild Barley Genotypes in Responses to Low Potassium
Source: PubMed Central journal article supplement (PMC4065039; doi:10.1371/journal.pone.0100567), 2014-06-20
Supplement: pone.0100567.s005.pdf [file pone.0100567.s005.pdf]

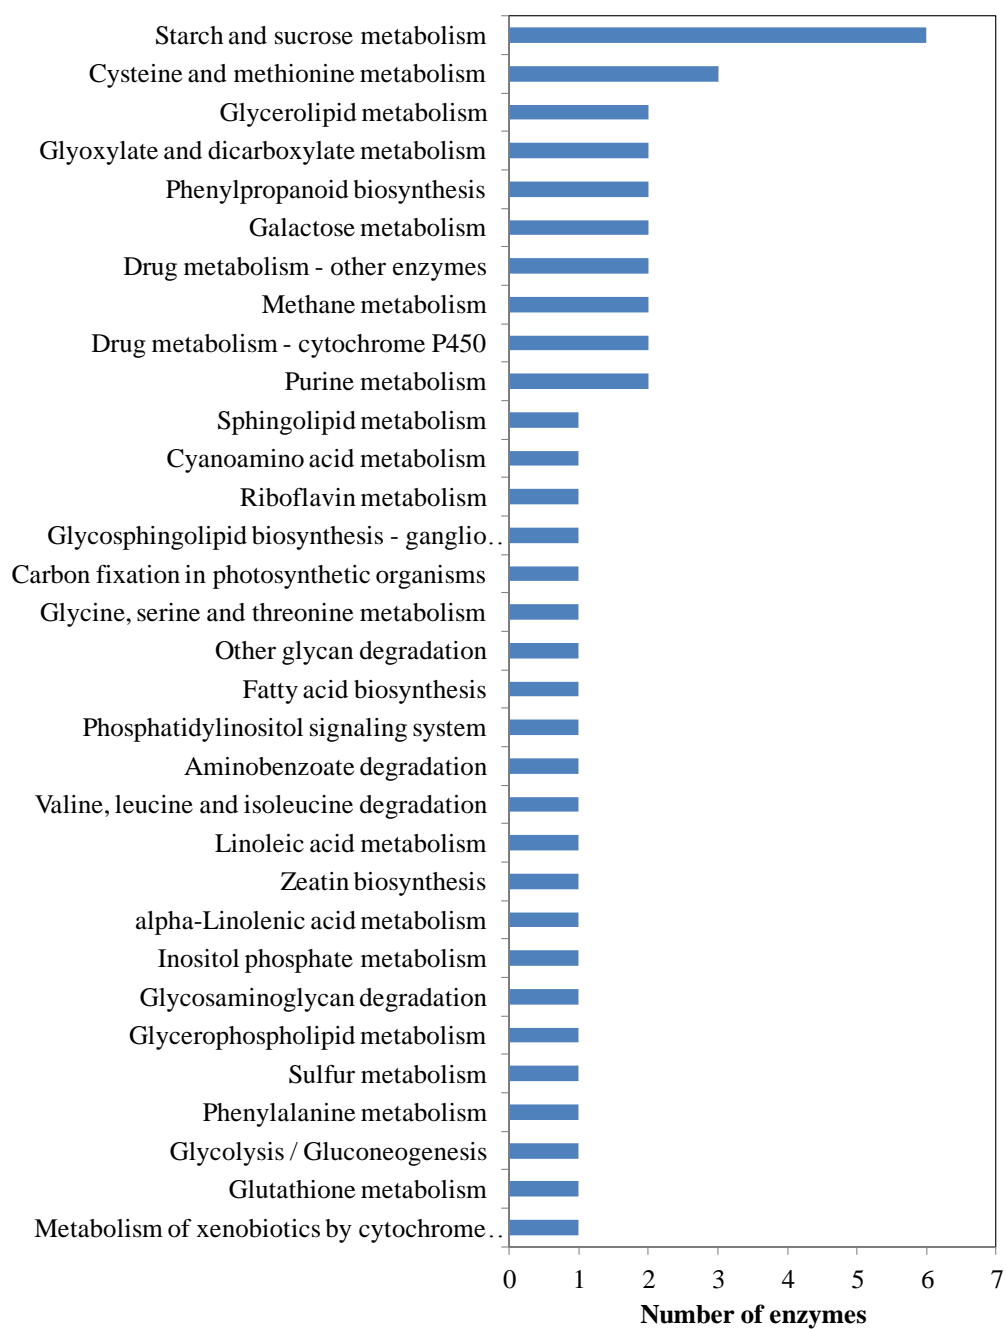

Figure S5. KEGG overview of low-K tolerance related DEGs under low K stress. X-axis represents the number of enzymes participating in each pathway; Y- axis depicts the different pathway.
